# Supplementary material for: Simple and efficient methods for discrimination of chiral diacids and chiral alpha-methyl amines
Source: Royal Society of Chemistry journal article supplement (doi:10.1039/c2ob25599e), 2012-01-01
Supplement: c2ob25599e.pdf [file c2ob25599e.pdf]

## Supporting Information

# Simple and Efficient Methods for Discrimination of Chiral Diacids and Chiral alpha-methyl Amines

*Sachin Rama Chaudhari, N. Suryaprakash\**

NMR Research Centre and Solid State and Structural Chemistry Unit, Indian Institute of  
Science, Bangalore 560012, India

Tel: ++91 80 22933300, Fax: ++91 80 23601550.

e-mail: [nsp@sif.iisc.ernet.in](mailto:nsp@sif.iisc.ernet.in)

- S1:**  $^1\text{H}$ -NMR spectrum of mixture of (*R,R*) and (*R,S*) derived from racemic mixture of phenyl succinic acid and 2-formylphenylboronic acid
- S2:**  $^1\text{H}$ -NMR spectrum of mixture of (*R,R*) and (*R,S*) derived from racemic mixture of bromo succinic acid and 2-formylphenylboronic acid
- S3:**  $^1\text{H}$ -NMR spectrum of mixture of (*R,R*) and (*R,S*) derived from racemic mixture of 2,3-dimethyl succinic acid and 2-formylphenylboronic acid
- S4:**  $^1\text{H}$ -NMR spectrum of mixture of (*R,R*) and (*R,S*) derived from racemic mixture of *trans*- 1,2-Cyclopentanedicarboxylic acid and 2-formylphenylboronic acid
- S5:**  $^1\text{H}$  and  $^{19}\text{F}\{^1\text{H}\}$ -NMR spectra of mixture of (*R,R*) and (*R,S*) derived from racemic mixture of methyl succinic acid and 3-fluoro-2-formylphenylboronic acid
- S6:**  $^1\text{H}$  and  $^{19}\text{F}\{^1\text{H}\}$ -NMR spectra of mixture of (*R,R*) and (*R,S*) derived from racemic mixture of phenyl succinic acid and 3-fluoro-2-formylphenylboronic acid
- S7:**  $^1\text{H}$  and  $^{19}\text{F}\{^1\text{H}\}$ -NMR spectra of mixture of (*R,R*) and (*R,S*) derived from racemic mixture of bromo succinic acid and 3-fluoro-2-formylphenylboronic acid
- S8:**  $^1\text{H}$  and  $^{19}\text{F}\{^1\text{H}\}$ -NMR spectra of mixture of (*R,R*) and (*R,S*) derived from racemic mixture of *trans*- 1,2-Cyclopentanedicarboxylic acid and 3-fluoro-2-formylphenylboronic acid
- S9:**  $^1\text{H}$  and  $^{19}\text{F}\{^1\text{H}\}$ -NMR spectra of mixture of (*R,R*) and (*R,S*) derived from racemic mixture of 2,3-dimethyl succinic acid and 3-fluoro-2-formylphenylboronic acid
- S10:**  $^1\text{H}$ -NMR spectrum of mixture of (*R,R*) and (*R,S*) derived from racemic mixture of 4-methyl- $\alpha$ -phenylethylamine and 2-formylphenylboronic acid
- S11:**  $^1\text{H}$ -NMR spectrum of mixture of (*R,R*) and (*R,S*) derived from racemic mixture of 4-Fluoro- $\alpha$ -phenylethylamine and 2-formylphenylboronic acid
- S12:**  $^1\text{H}$ -NMR spectrum of mixture of (*R,R*) and (*R,S*) derived from racemic mixture of 1-(1-Naphthyl)ethylamine and 2-formylphenylboronic acid
- S13:**  $^1\text{H}$  and  $^{19}\text{F}\{^1\text{H}\}$ -NMR spectra of mixture of (*R,R*) and (*R,S*) derived from racemic mixture of methyl benzylamine and 3-fluoro-2-formylphenylboronic acid
- S14:**  $^1\text{H}$  and  $^{19}\text{F}\{^1\text{H}\}$ -NMR spectra of mixture of (*R,R*) and (*R,S*) derived from racemic mixture of 4-methyl- $\alpha$ -phenylethylamine and 3-fluoro-2-formylphenylboronic acid respectively
- S15:**  $^1\text{H}$  and  $^{19}\text{F}\{^1\text{H}\}$ -NMR spectra of mixture of (*R,R*) and (*R,S*) derived from racemic mixture of 4-Fluoro- $\alpha$ -phenylethylamine and 3-fluoro-2-formylphenylboronic acid respectively
- S16:**  $^1\text{H}$  and  $^{19}\text{F}\{^1\text{H}\}$ -NMR spectra of mixture of (*R,R*) and (*R,S*) derived from racemic mixture of 1-(1-Naphthyl)ethylamine and 3-fluoro-2-formylphenylboronic acid respectively
- S17:**  $^{13}\text{C}\{^1\text{H}\}$  NMR spectrum of mixture of (*R,R*) and (*R,S*) derived from racemic mixture of methyl succinic acid and 2-formylphenylboronic acid and 3-fluoro-2-formylphenylboronic acid respectively

- S18:**  $^{13}\text{C}\{^1\text{H}\}$  NMR spectrum of mixture of (*R,R*) and (*R,S*) derived from racemic mixture of phenyl succinic acid and 2-formylphenylboronic acid and 3-fluoro-2-formylphenylboronic acid respectively
- S19:**  $^{13}\text{C}\{^1\text{H}\}$  NMR spectrum of mixture of (*R,R*) and (*R,S*) derived from racemic mixture of bromo succinic acid and 2-formylphenylboronic acid and 3-fluoro-2-formylphenylboronic acid respectively
- S20:**  $^{13}\text{C}\{^1\text{H}\}$  NMR spectrum of mixture of (*R,R*) and (*R,S*) derived from racemic mixture of 2,3-dimethyl succinic acid and 2-formylphenylboronic acid and 3-fluoro-2-formylphenylboronic acid respectively
- S21:**  $^{13}\text{C}\{^1\text{H}\}$  NMR spectrum of mixture of (*R,R*) and (*R,S*) derived from racemic mixture of *trans*- 1,2-Cyclopentanedicarboxylic acid and 2-formylphenylboronic acid and 3-fluoro-2-formylphenylboronic acid respectively
- S22:**  $^{13}\text{C}\{^1\text{H}\}$  NMR spectrum of mixture of (*R,R*) and (*R,S*) derived from racemic mixture of alpha-methylbenzylamine and 2-formylphenylboronic acid and 3-fluoro-2-formylphenylboronic acid respectively
- S23:**  $^{13}\text{C}\{^1\text{H}\}$  NMR spectrum of mixture of (*R,R*) and (*R,S*) derived from racemic mixture of 4-methyl-alpha-phenylethylamine and 2-formylphenylboronic acid and 3-fluoro-2-formylphenylboronic acid respectively
- S24:**  $^{13}\text{C}\{^1\text{H}\}$ -NMR spectrum of mixture of (*R,R*) and (*R,S*) derived from racemic mixture of 4-Fluoro-alpha-phenylethylamine and 2-formylphenylboronic acid and 3-fluoro-2-formylphenylboronic acid respectively
- S25:**  $^{13}\text{C}\{^1\text{H}\}$  NMR spectrum of mixture of (*R,R*) and (*R,S*) derived from racemic mixture of 1-(1-Naphthyl)ethylamine and 2-formylphenylboronic acid and 3-fluoro-2-formylphenylboronic acid respectively

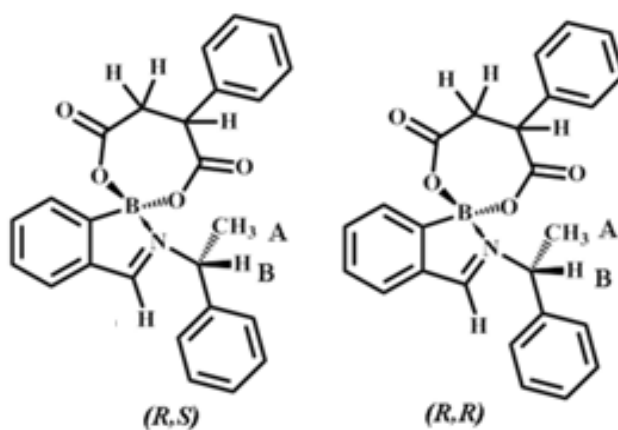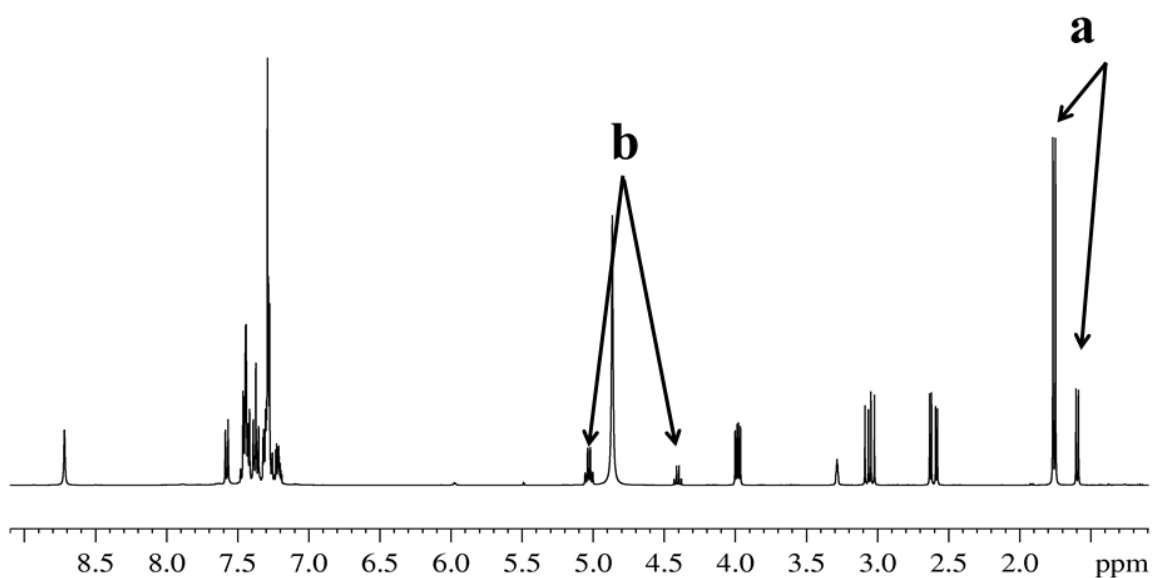

$^1\text{H}$ -NMR spectrum of imino boronate esters of phenylsuccinic acid

**S1**

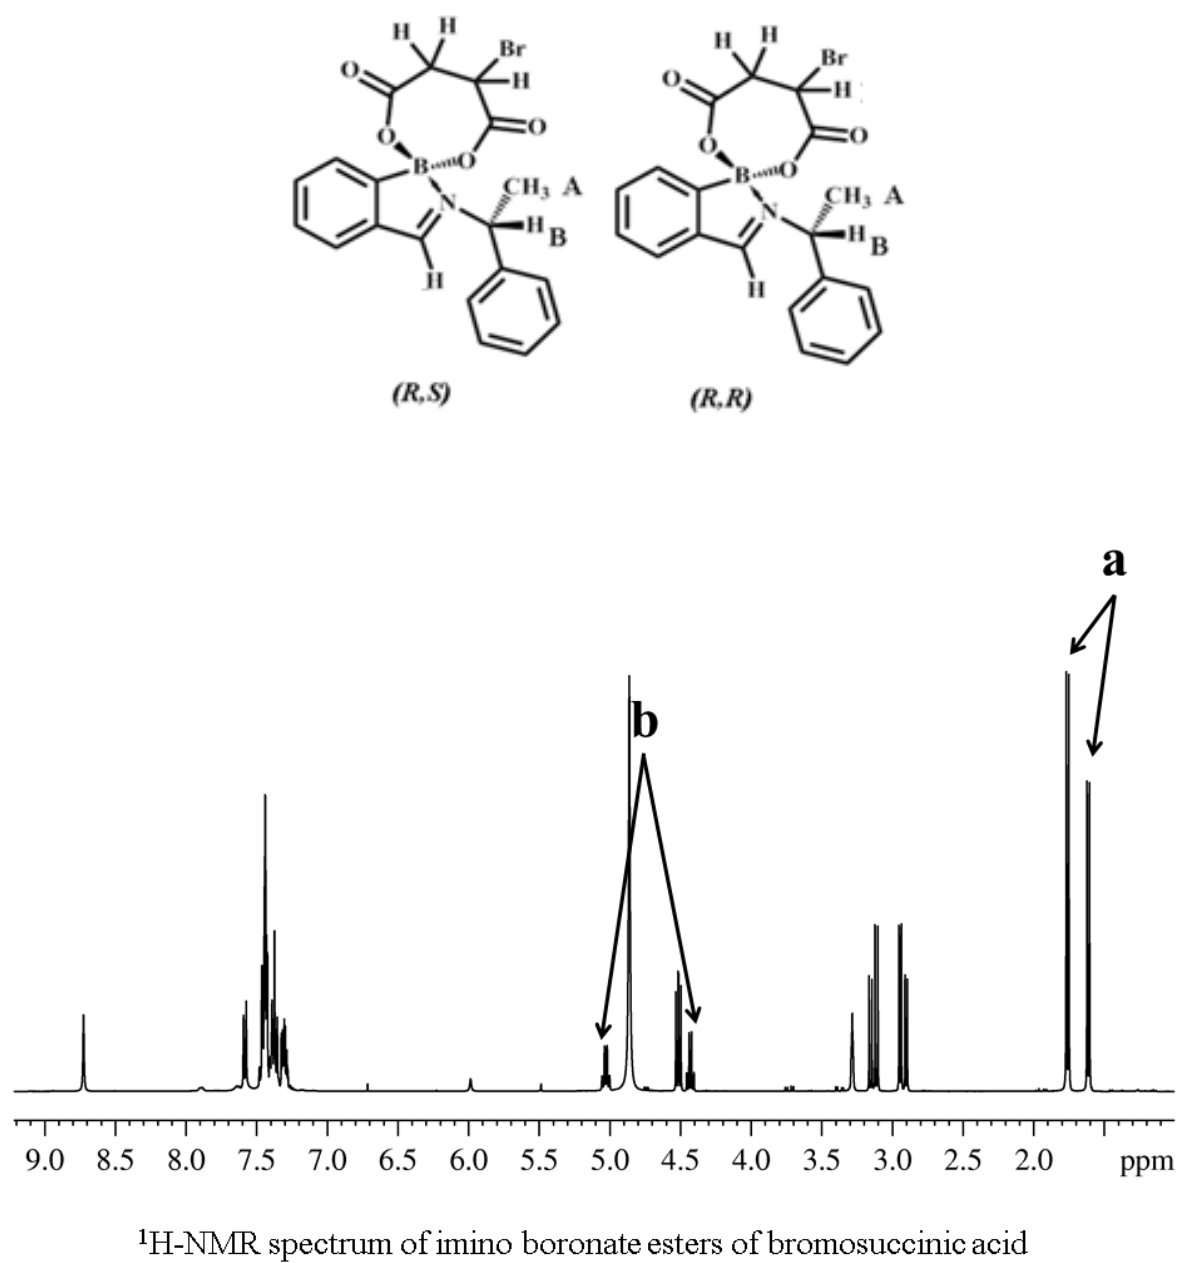

S2

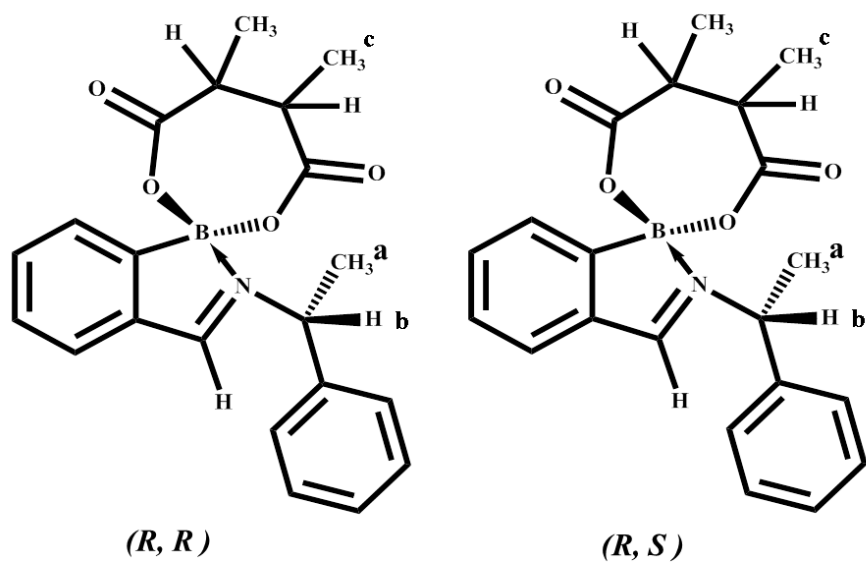

$^1\text{H}$ -NMR spectrum of imino boronate esters of 2,3-dimethylsuccinic acid

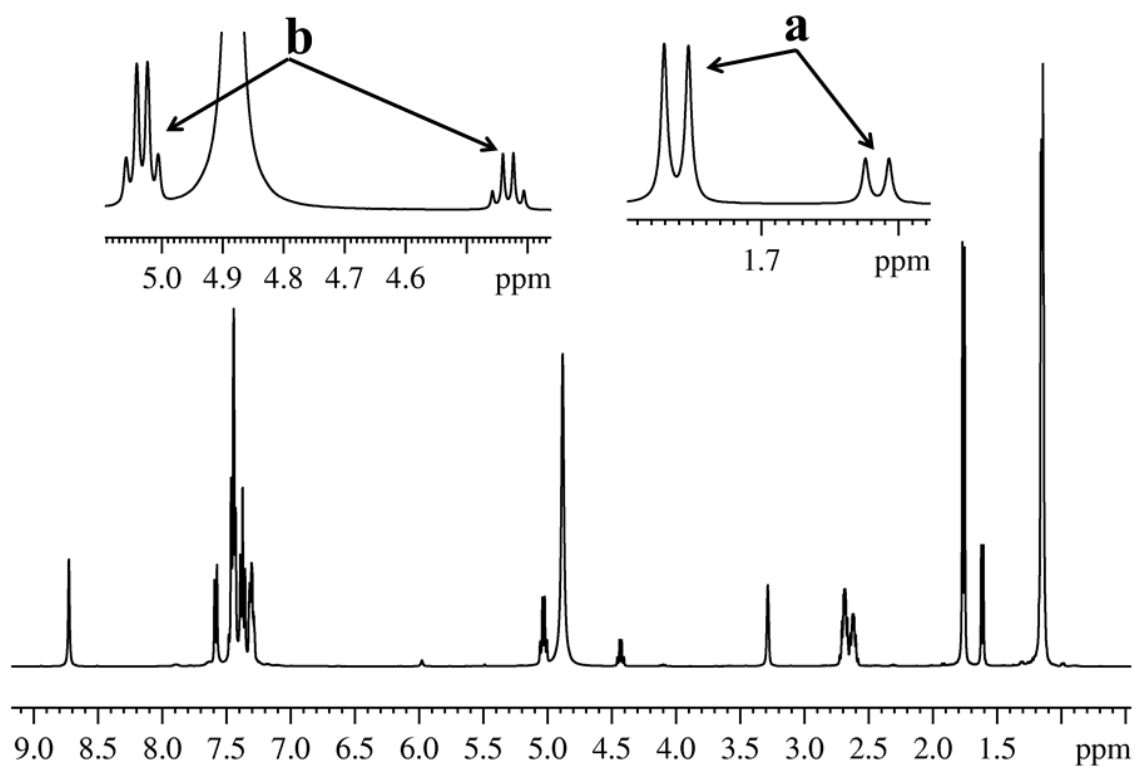

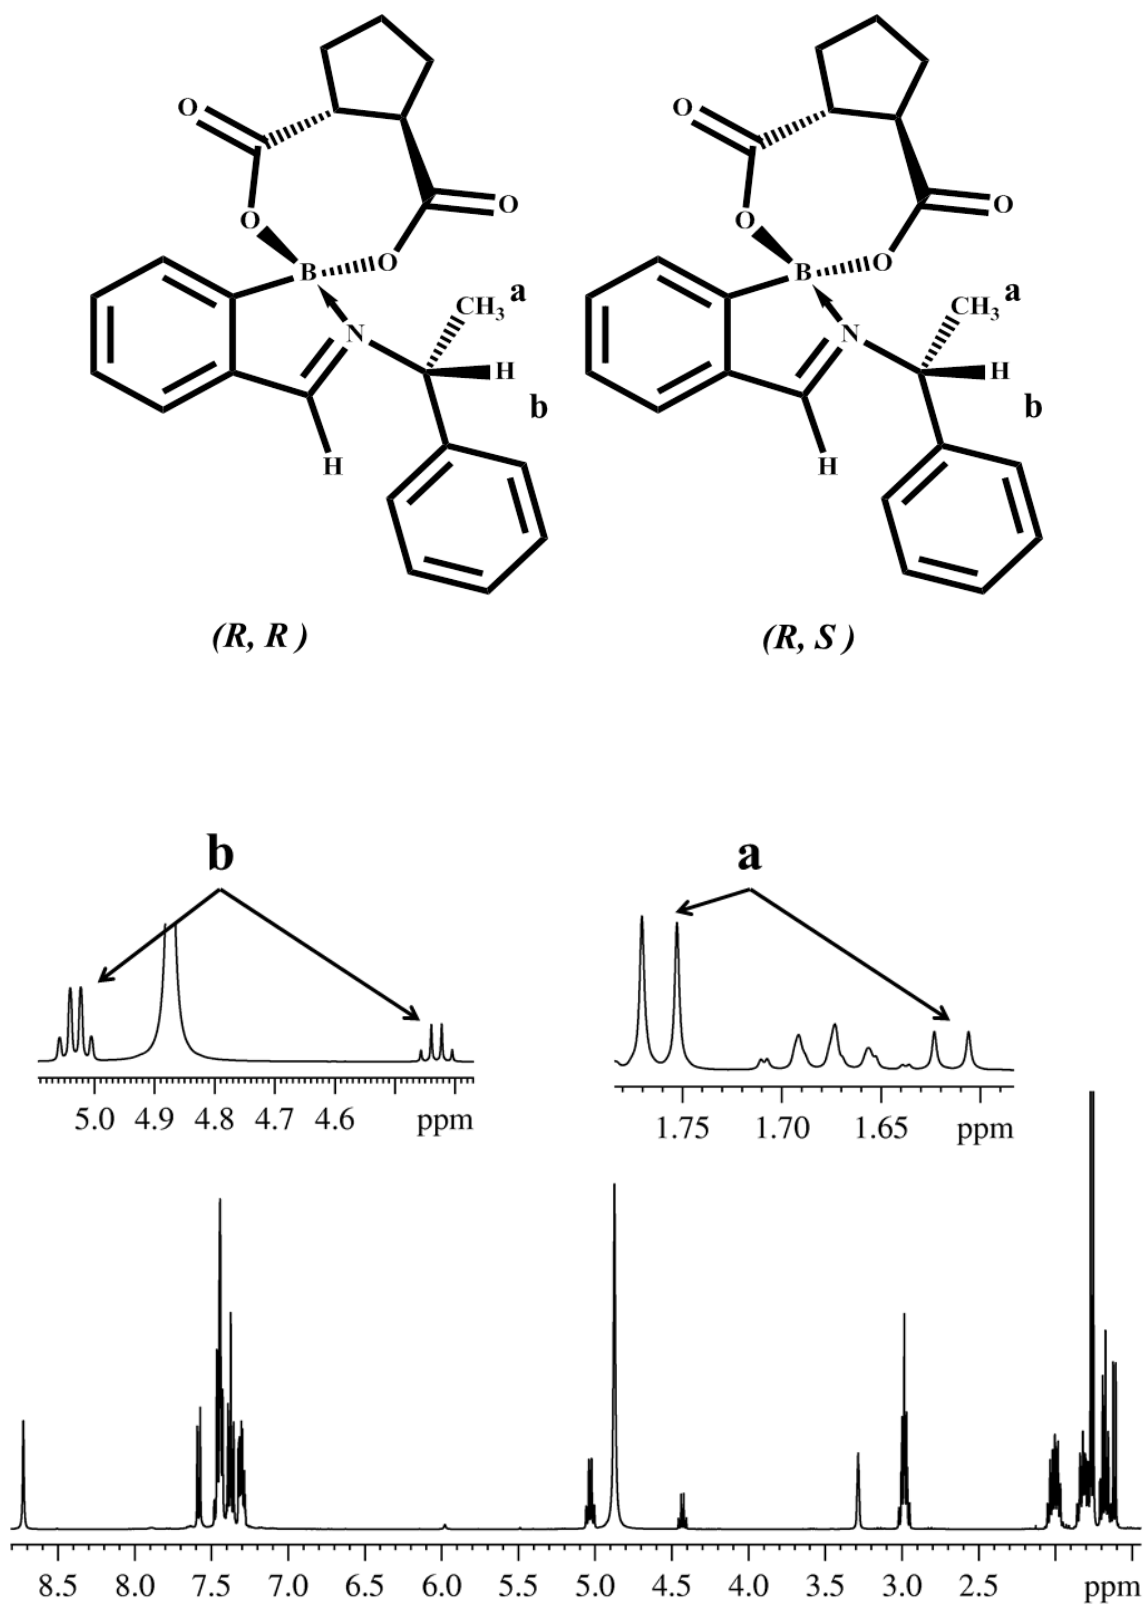

S4

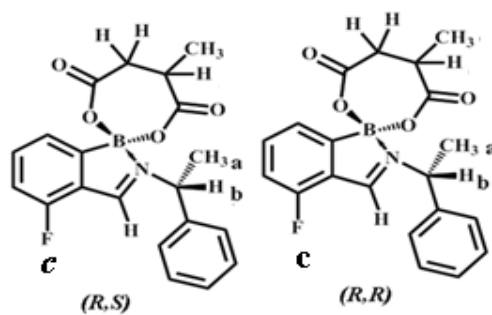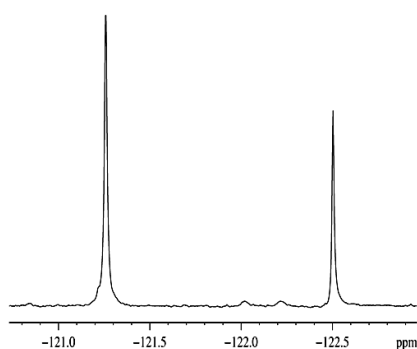

$^{19}\text{F}$ -NMR spectrum of imino boronate esters of methylsuccinic acid

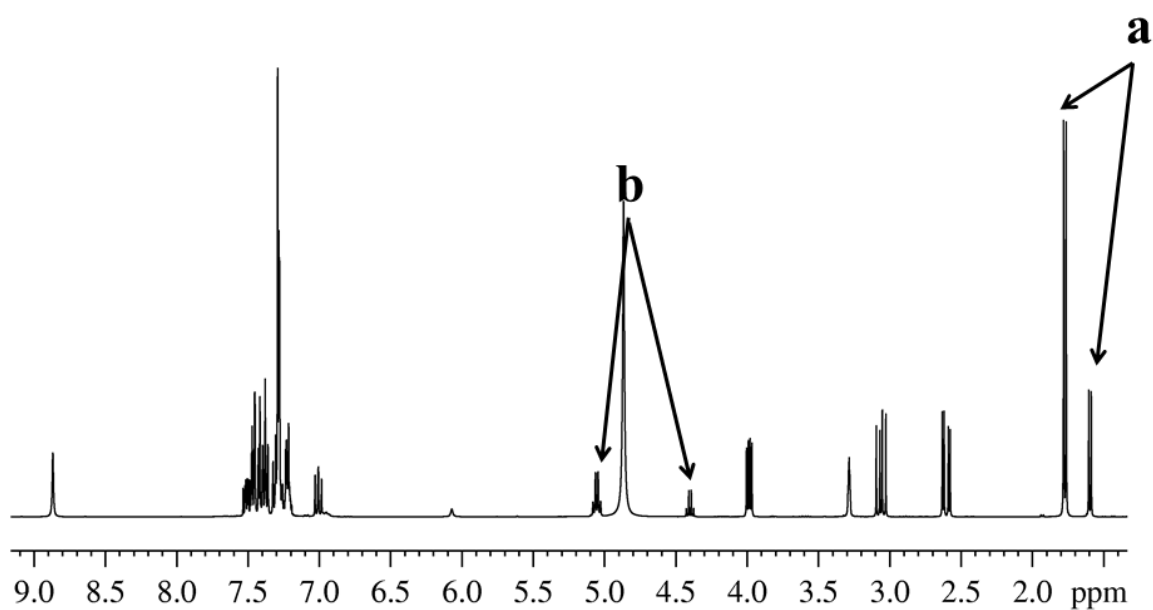

$^1\text{H}$ -NMR spectrum of imino boronate esters of methylsuccinic acid

**S5**



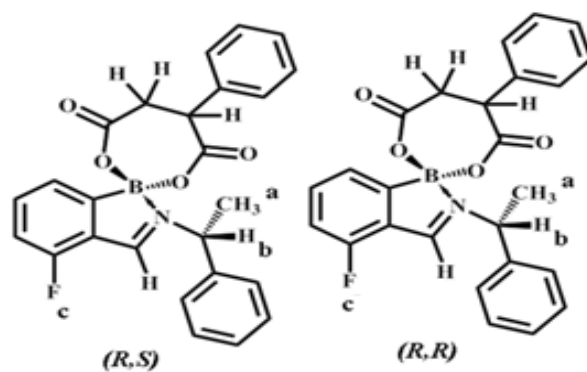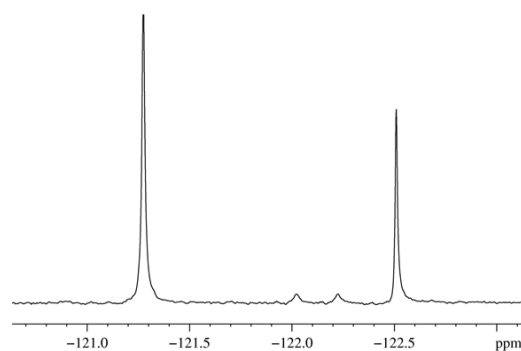

$^{19}\text{F}$ -NMR spectrum of imino boronate esters of phenylsuccinic acid

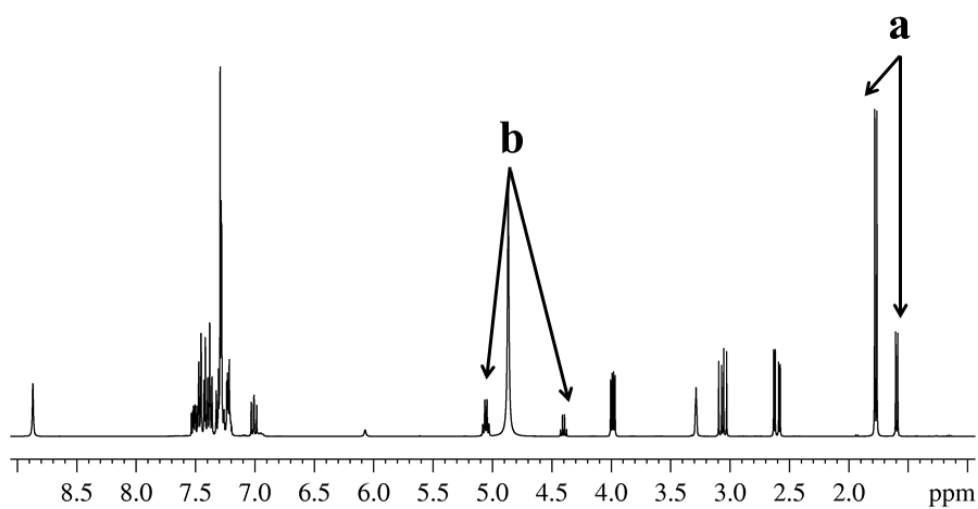

$^1\text{H}$ -NMR spectrum of imino boronate esters of phenylsuccinic acid

**S6**

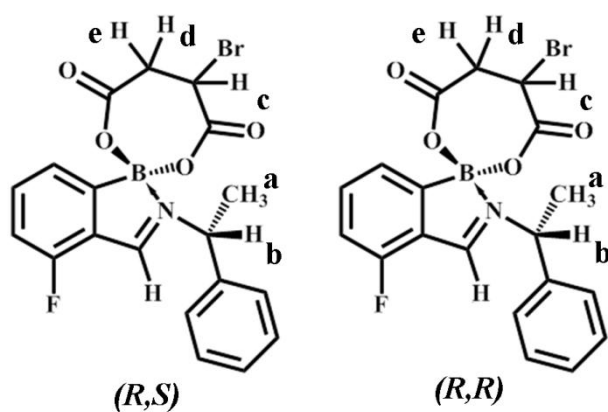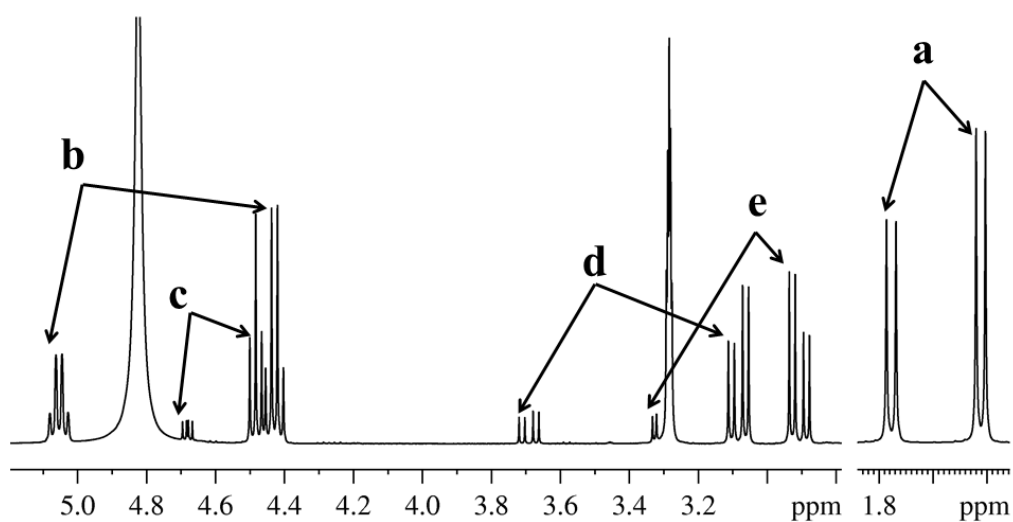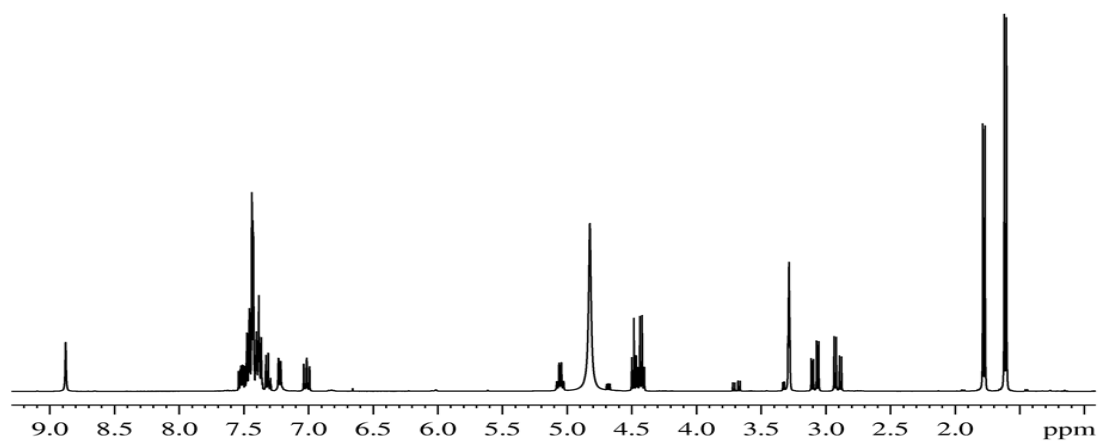

$^1\text{H}$ -NMR spectrum of imino boronate esters of bromosuccinic acid

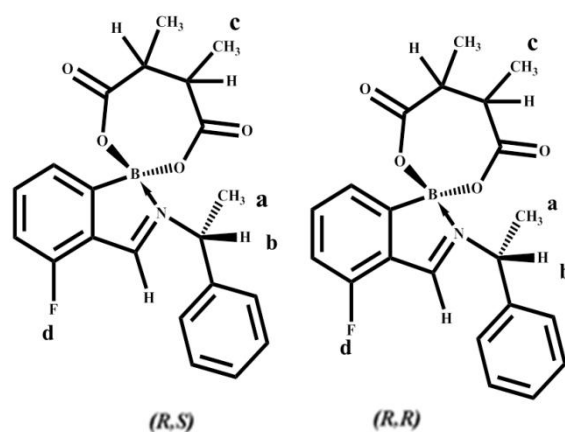

$^1\text{H}$ -NMR spectrum of imino boronate esters of 2,3-dimethyl succinic acid

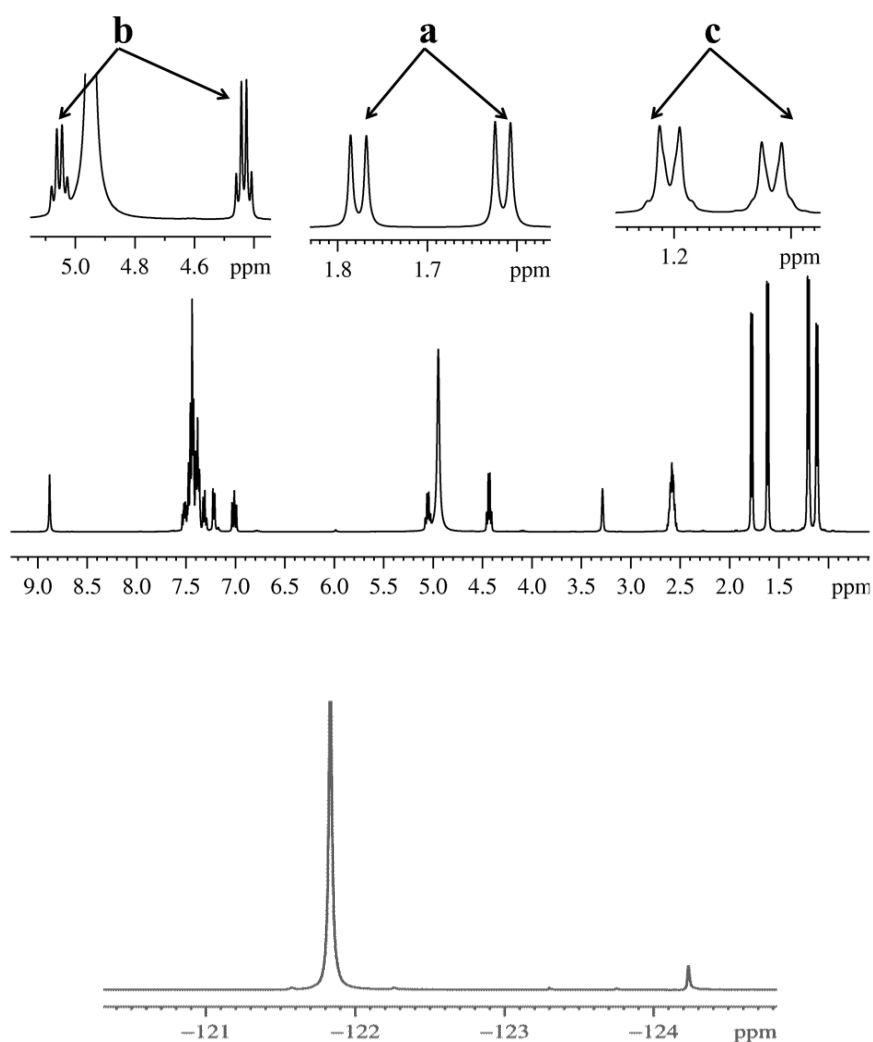

**S8**

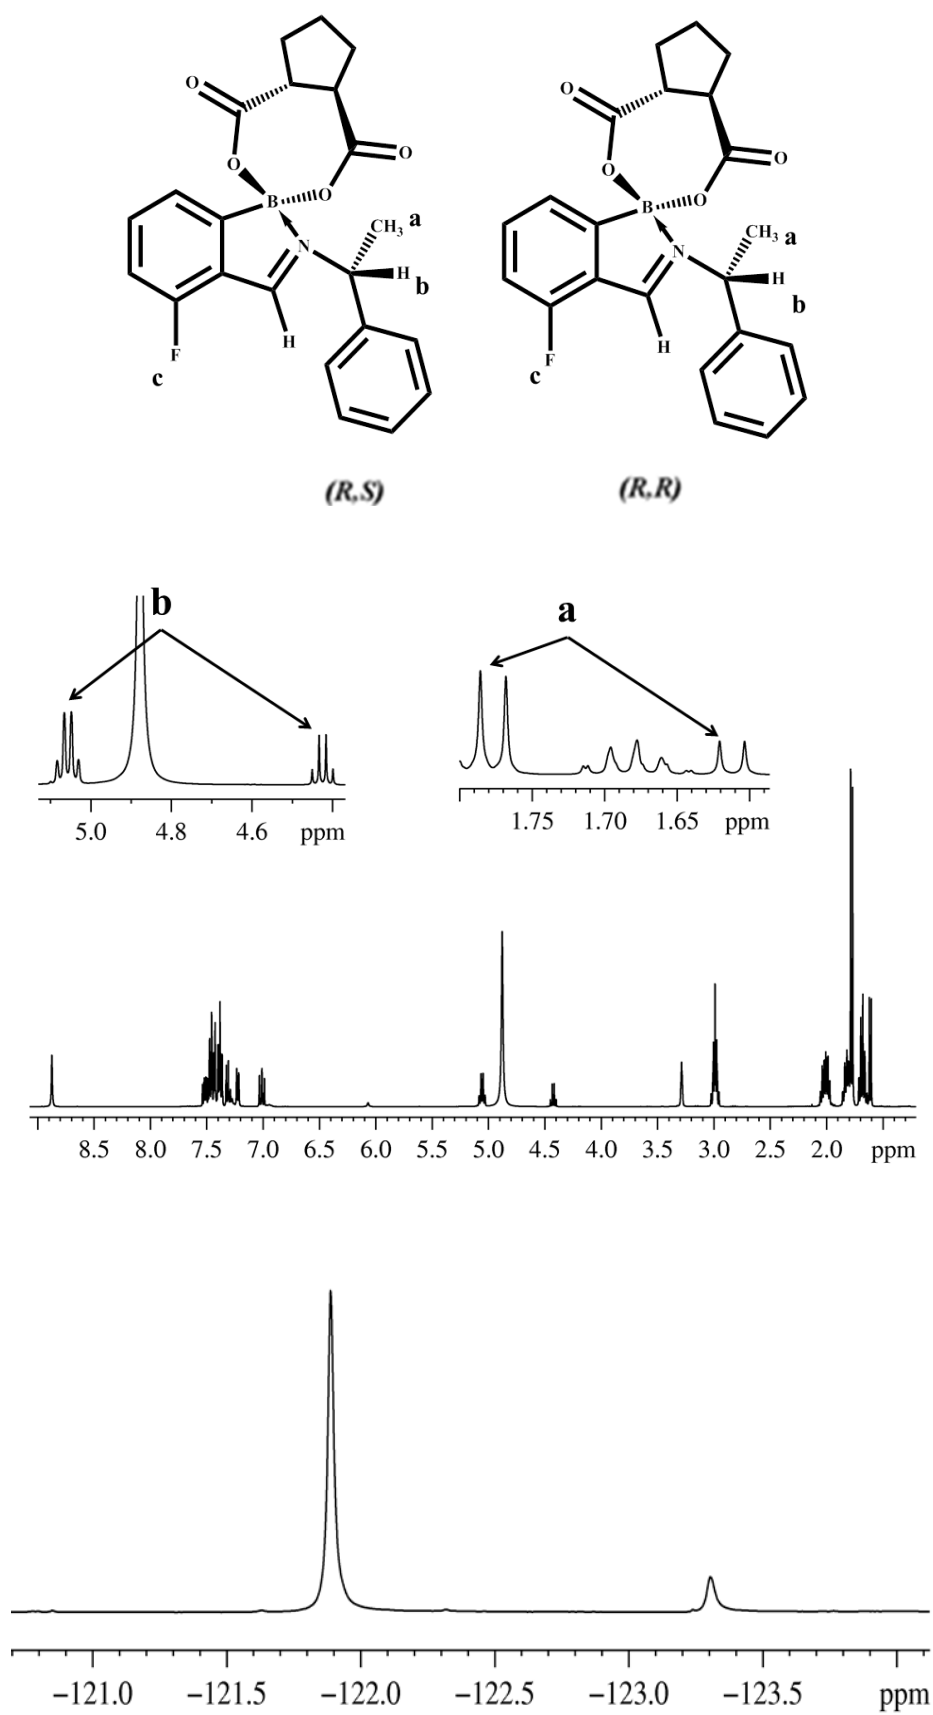

**S9**

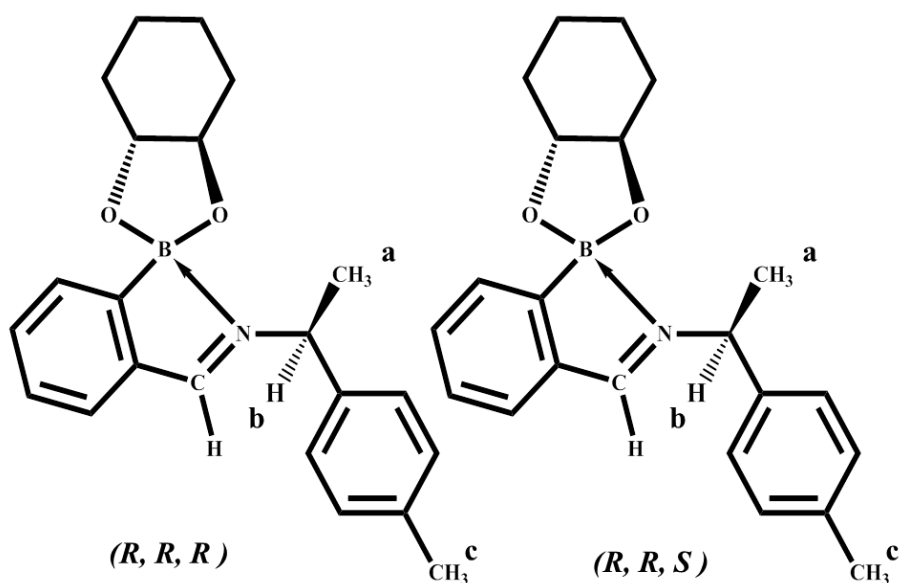

$^1\text{H}$ -NMR spectrum of imino boronate esters of 4-methyl- $\alpha$ -phenylethylamine

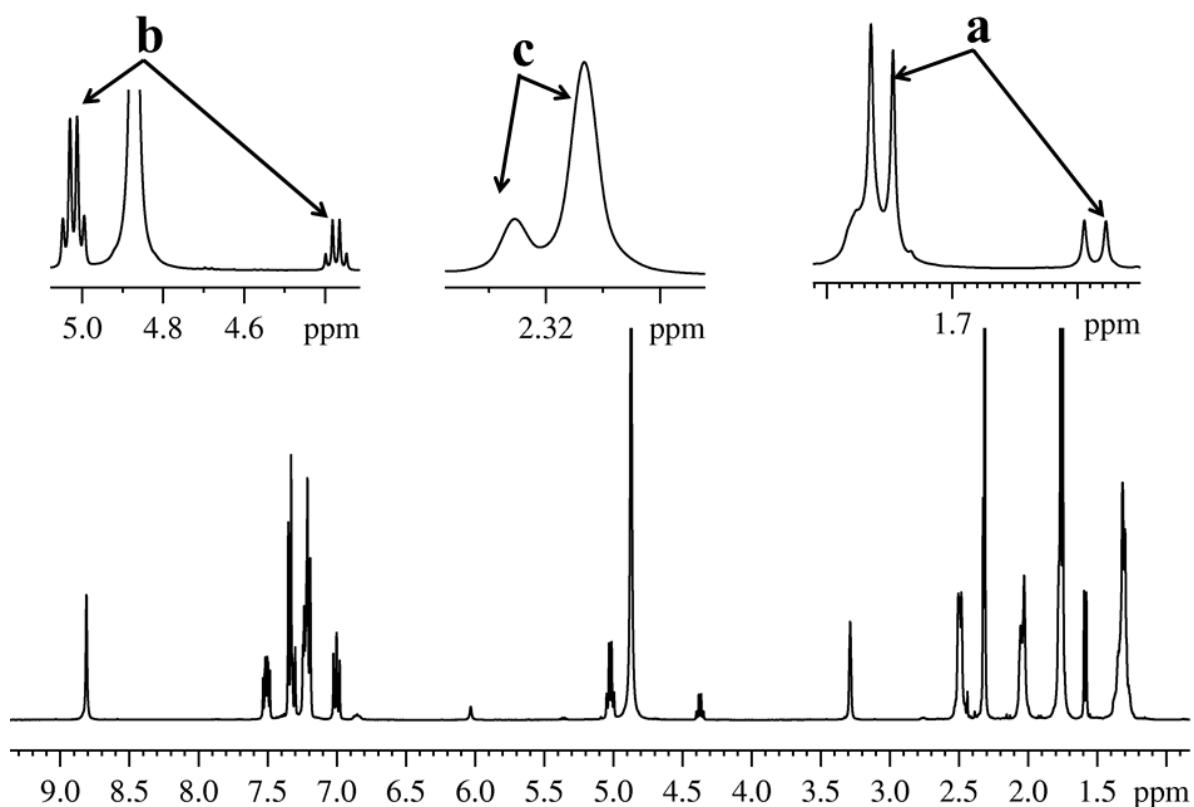

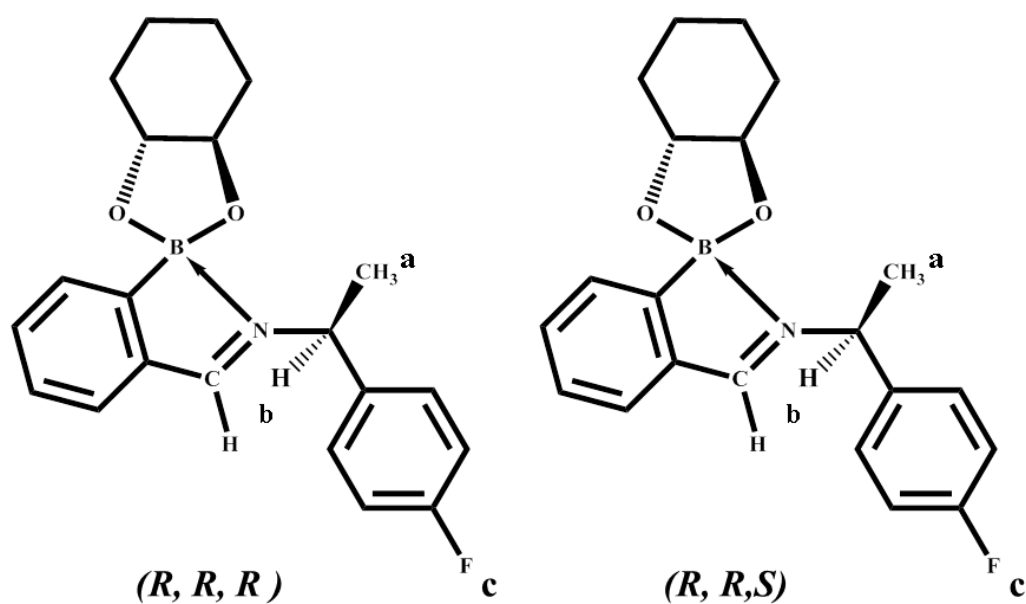

<sup>1</sup>H-NMR spectrum of imino boronate esters of 4-Fluoro- $\alpha$ -phenylethylamine

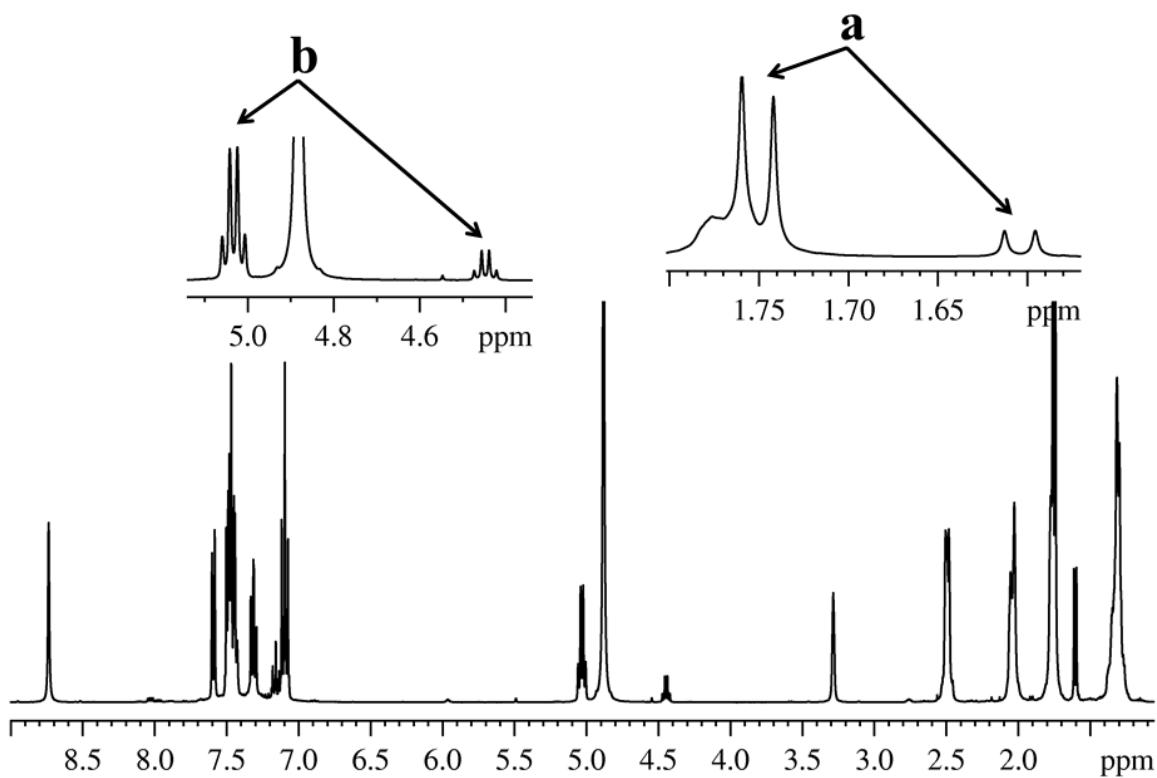

**S11**

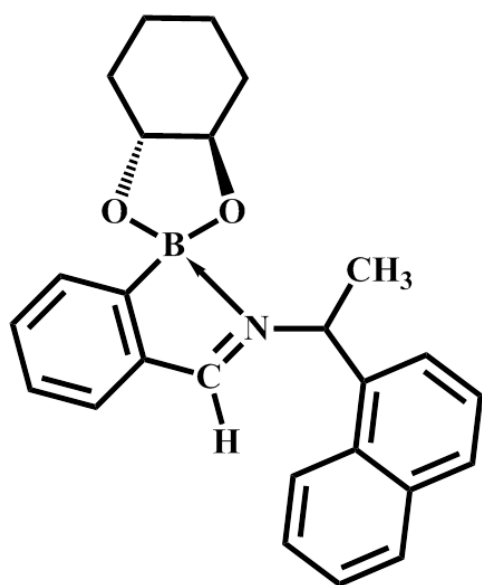

*(R, R, R)*

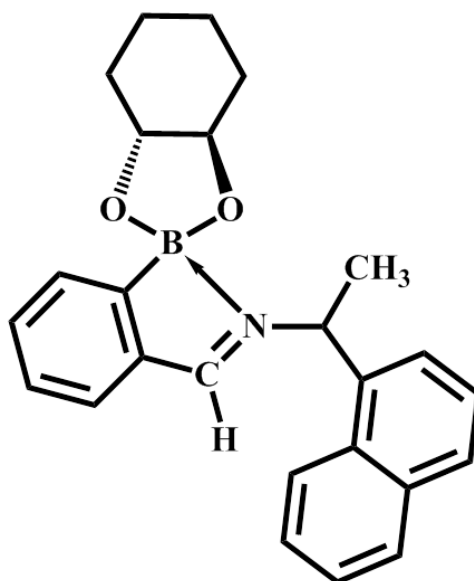

*(R, R, S)*

<sup>1</sup>H-NMR spectrum of imino boronate esters of 1-(1-Naphthyl)ethylamine

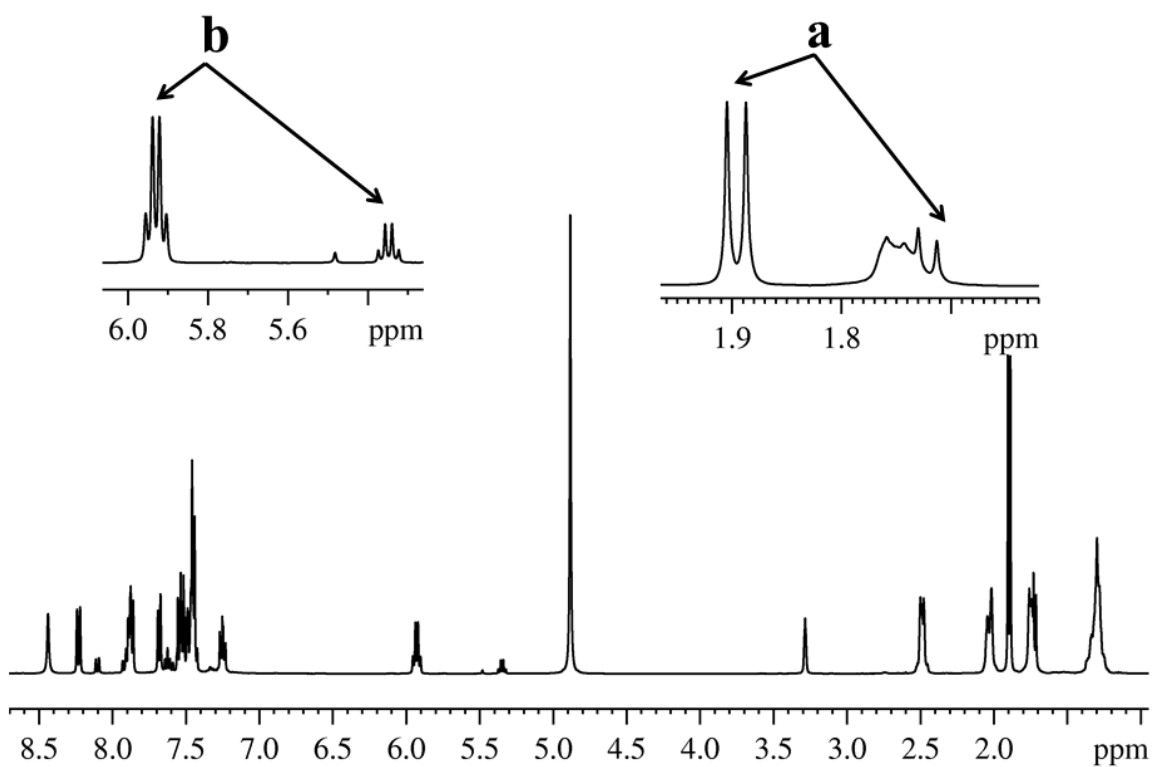

**S12**

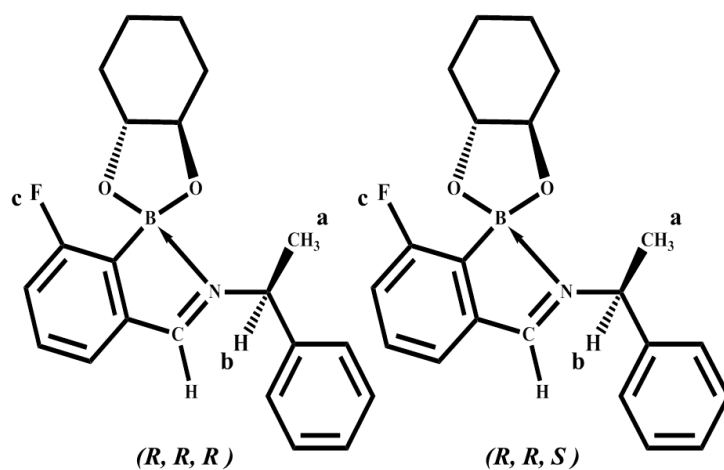

$^1\text{H}$ -NMR spectrum of imino boronate esters of alpha-methylbenzylamine

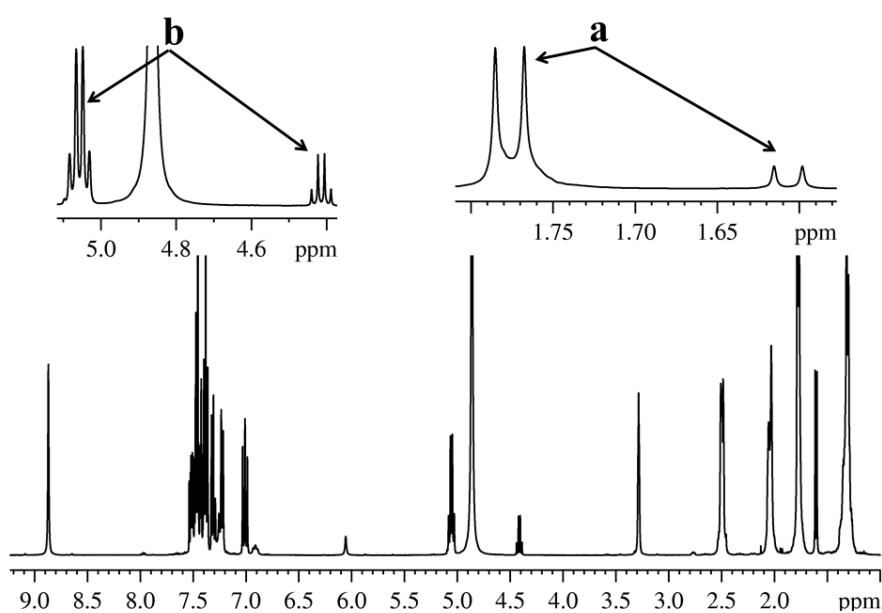

$^{19}\text{F}$ -NMR spectrum of imino boronate esters of alpha methylbenzylamine

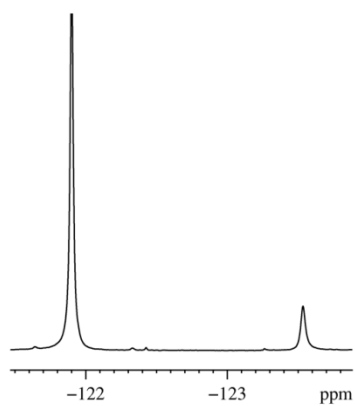

**S13**



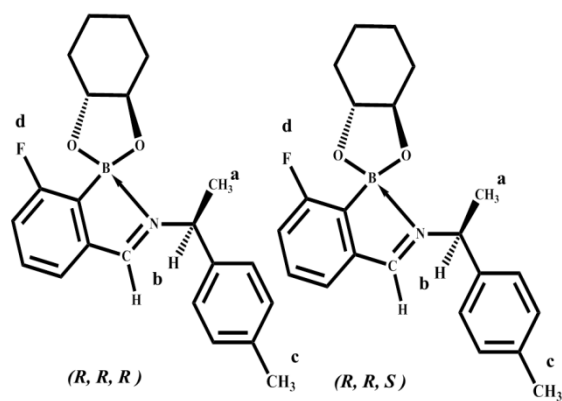

$^1\text{H}$ -NMR spectrum of imino boronate esters of 4-methyl- $\alpha$ -phenylethylamine

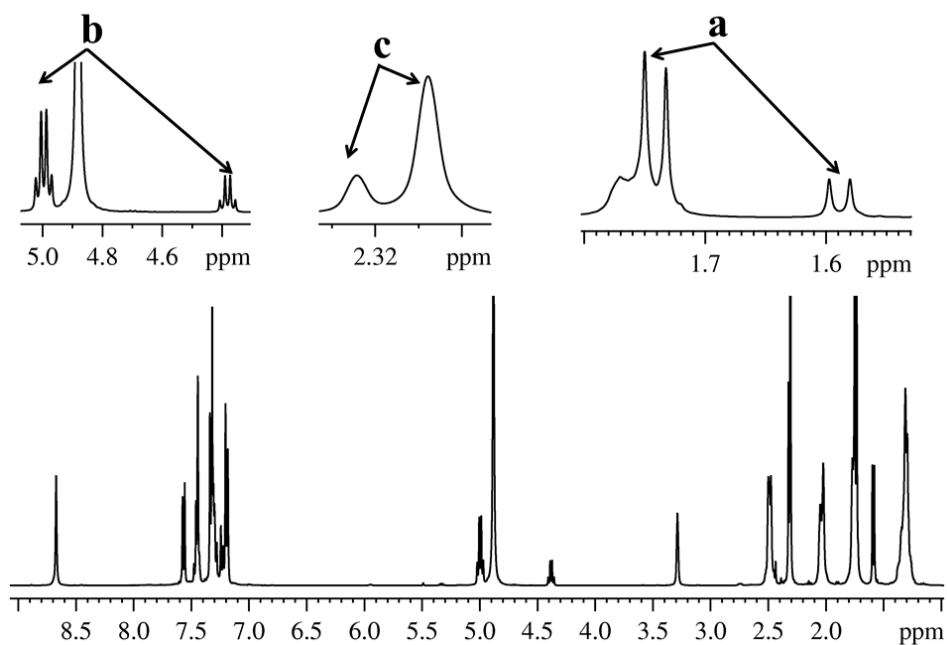

$^{19}\text{F}$ -NMR spectrum of imino boronate esters of 4-methyl- $\alpha$ -phenylethylamine

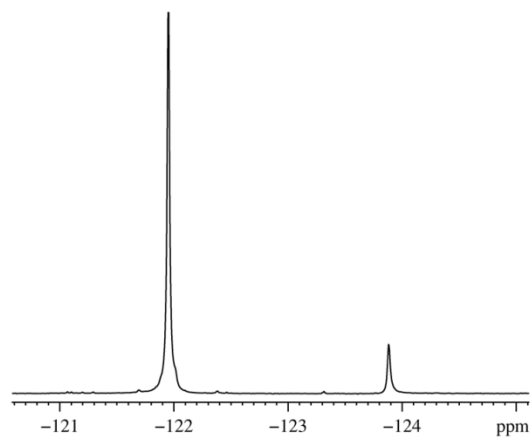

**S14**

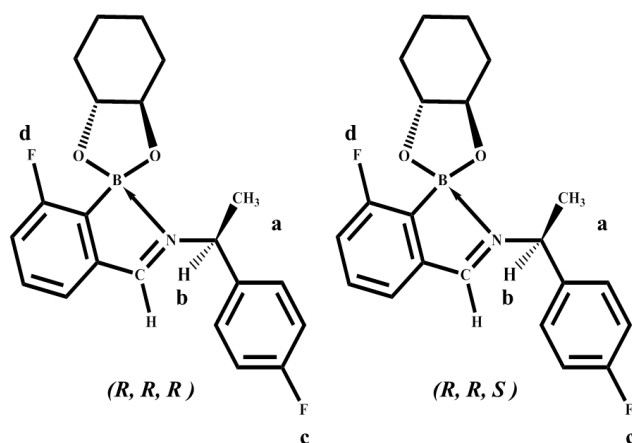

$^1\text{H}$ -NMR spectrum of imino boronate esters of 4-Fluoro- $\alpha$ -phenylethylamine

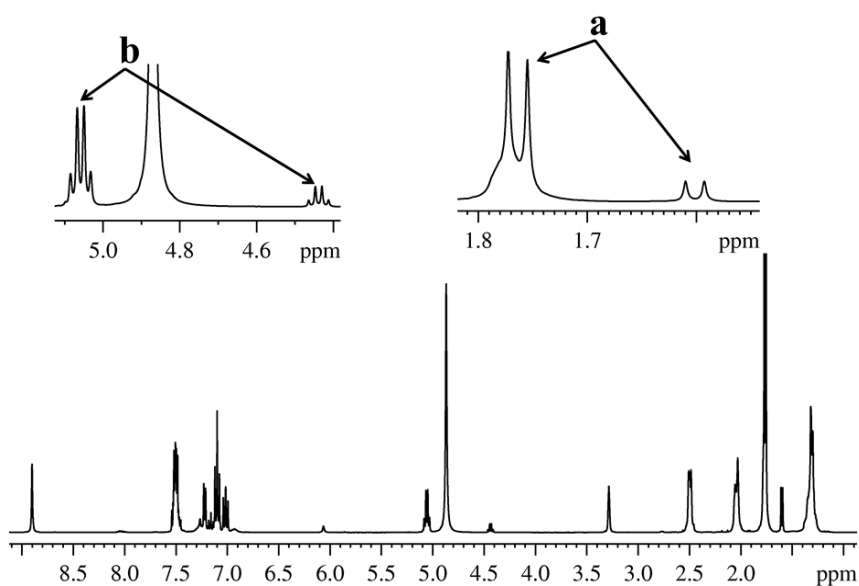

$^{19}\text{F}$ -NMR spectrum of imino boronate esters of 4-methyl- $\alpha$ -phenylethylamine

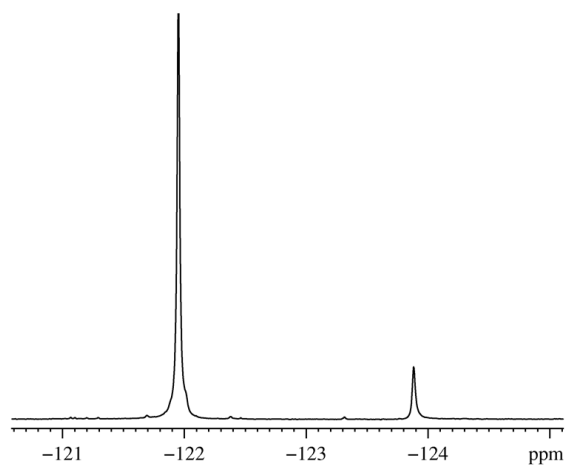

**S15**

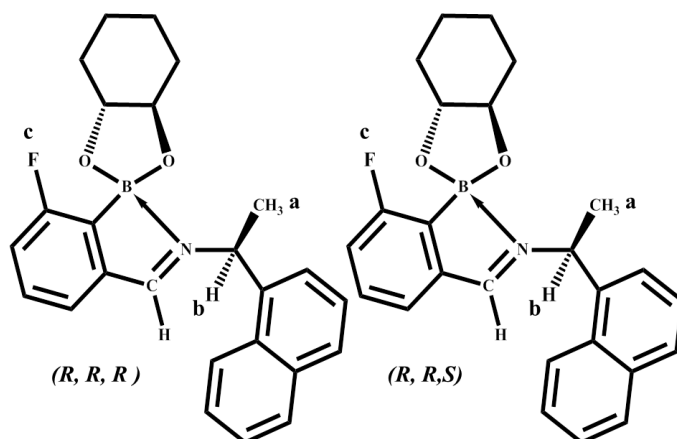

$^1\text{H}$ -NMR spectrum of imino boronate esters of 1-(1-Naphthyl)ethylamine

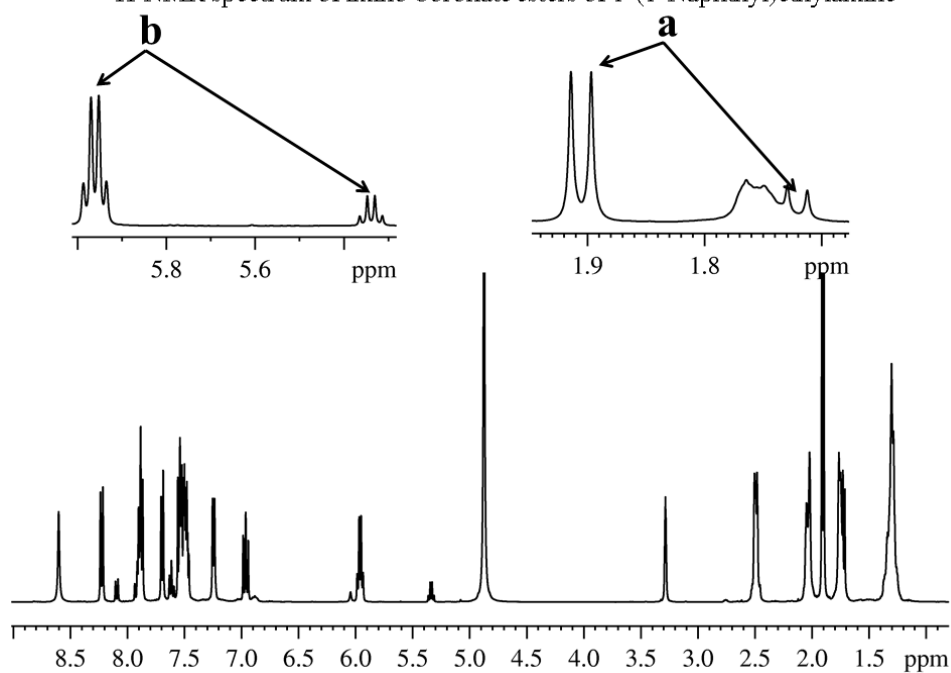

$^{19}\text{F}$ -NMR spectrum of imino boronate esters of 1-(1-Naphthyl)ethylamine

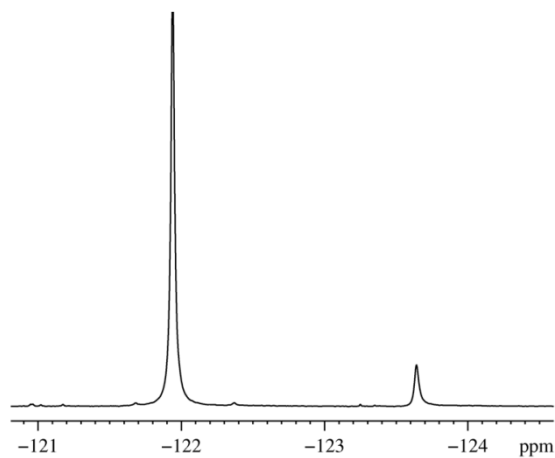

**S16**

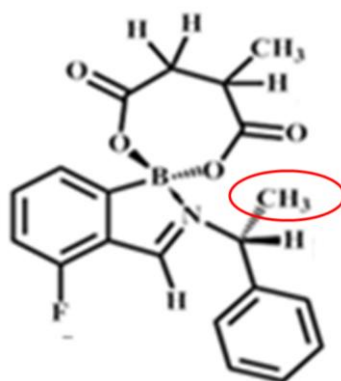

$^{13}\text{C}$ -NMR spectrum of imino boronate esters of Methyl succinic acid

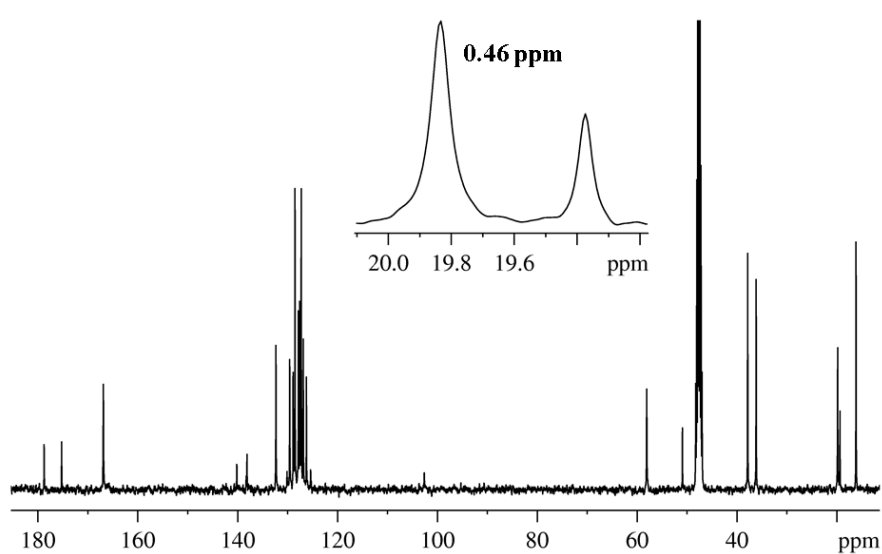

$^{13}\text{C}$ -NMR spectrum of imino boronate esters of Methyl succinic acid

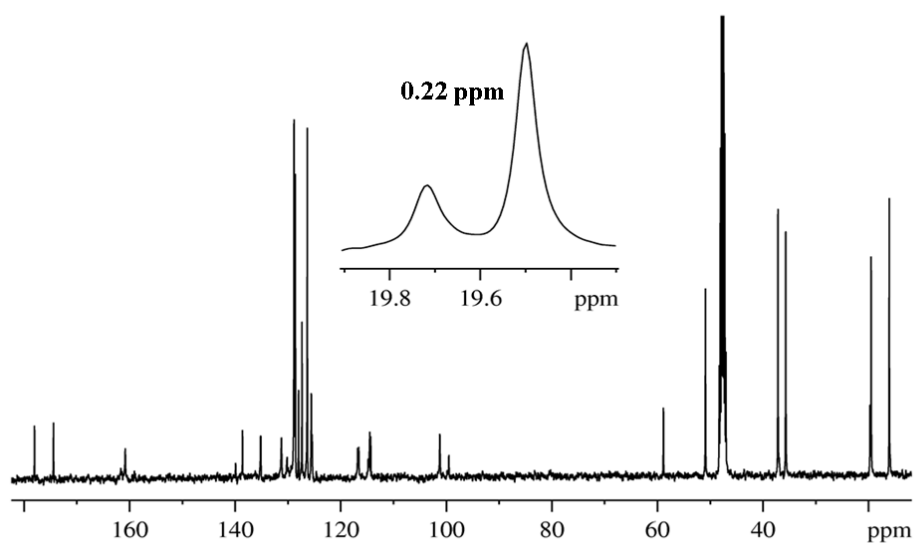

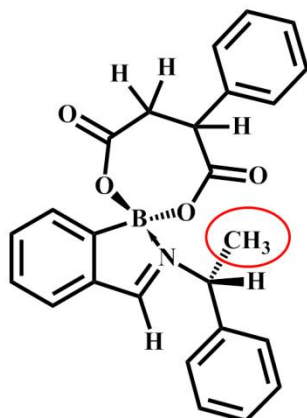

$^{13}\text{C}$ -NMR spectrum of imino boronate esters of Phenyl succinic acid

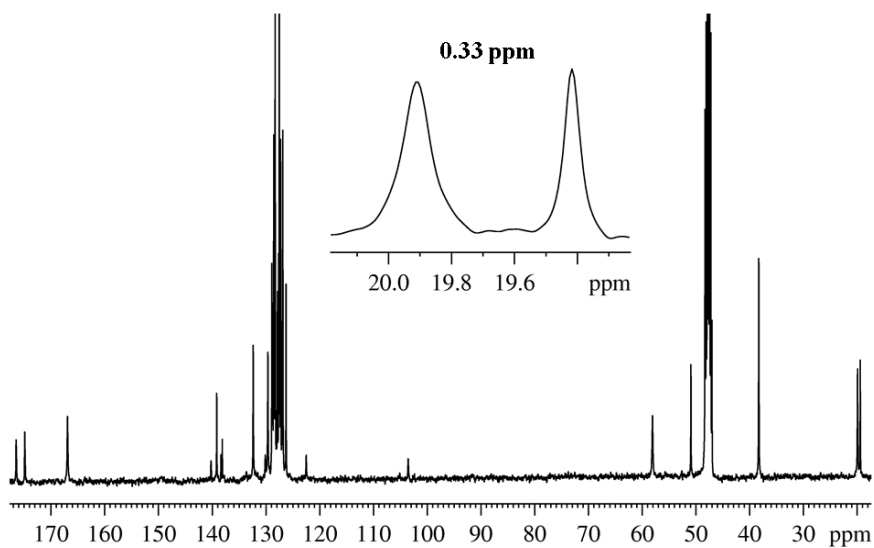

**S18**

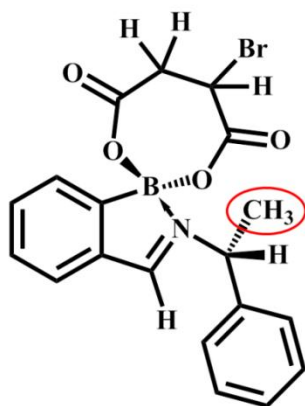

$^{13}\text{C}$ -NMR spectrum of imino boronate esters of bromo succinic acid

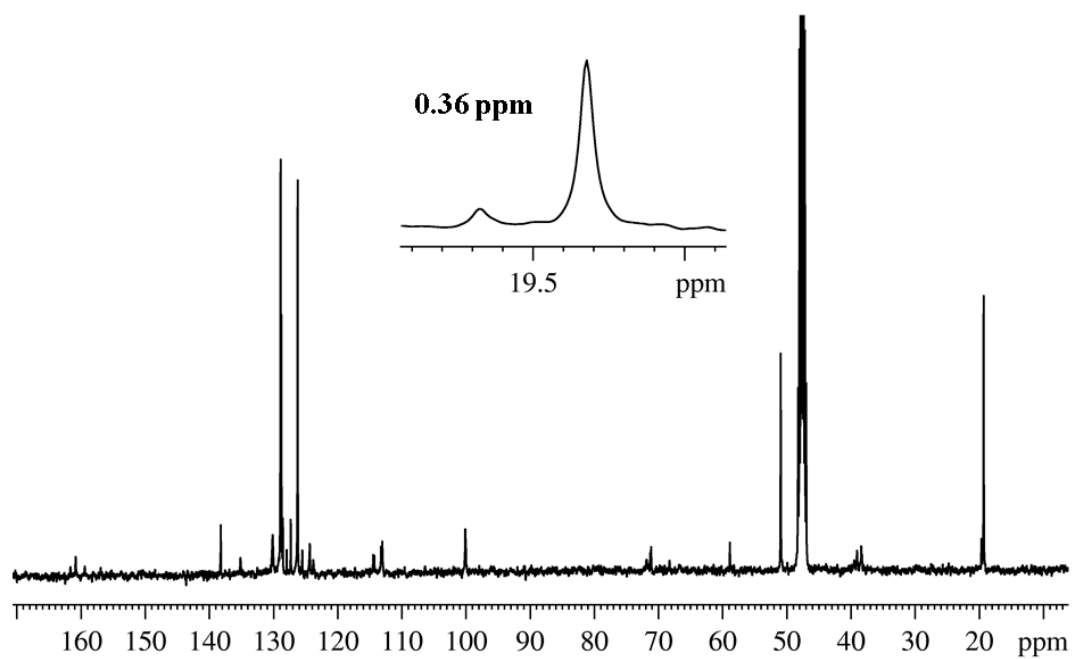

**S19**

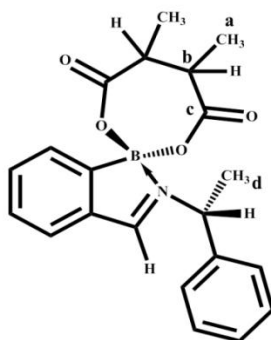

$^{13}\text{C}$ -NMR spectrum of imino boronate esters of 2,3-dimethylsuccinic acid

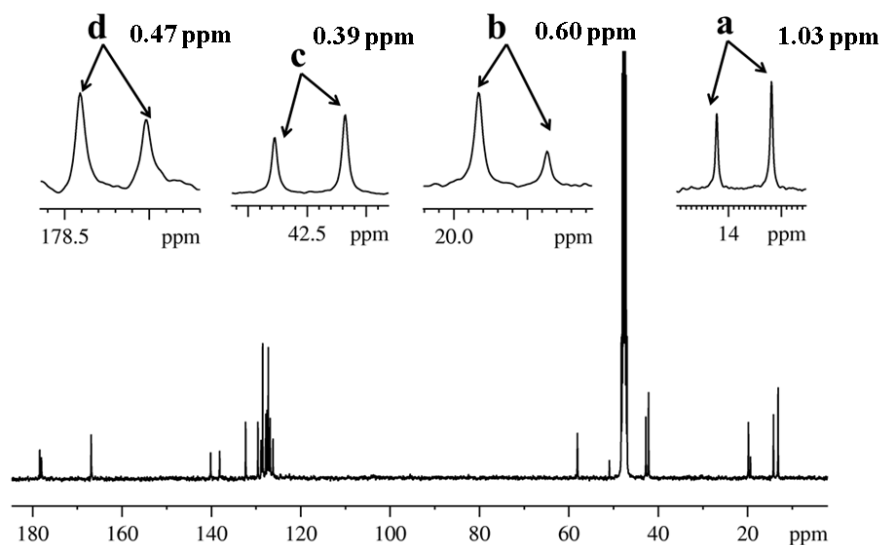

$^{13}\text{C}$ -NMR spectrum of imino boronate esters of 2,3-dimethylsuccinic acid

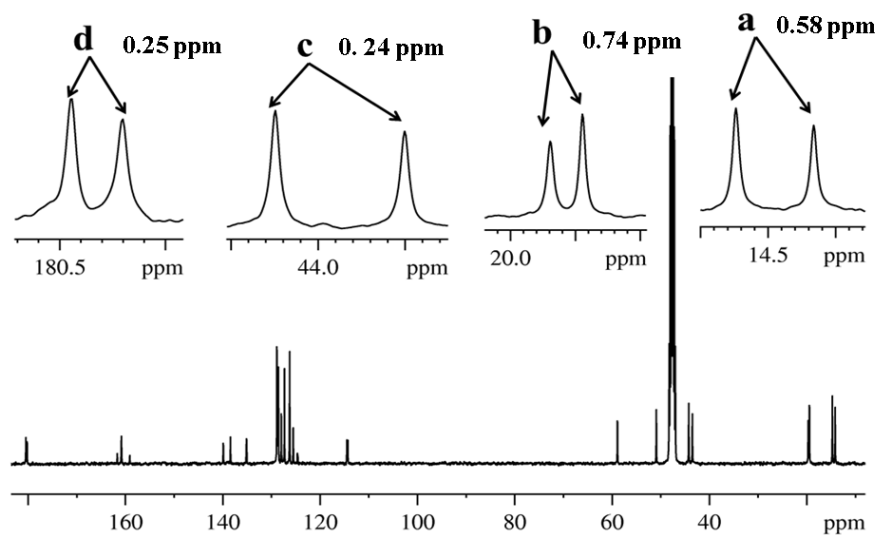

S20

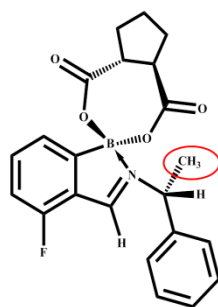

$^{13}\text{C}$ -NMR spectrum of imino boronate esters of trans-1,2-Cyclopentanedicarboxylic acid

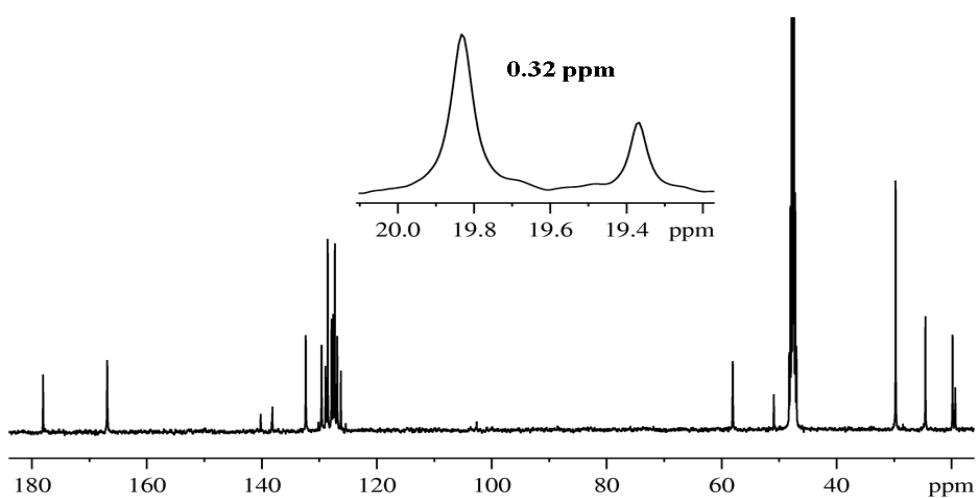

$^{13}\text{C}$ -NMR spectrum of imino boronate esters of trans-1,2-Cyclopentanedicarboxylic acid

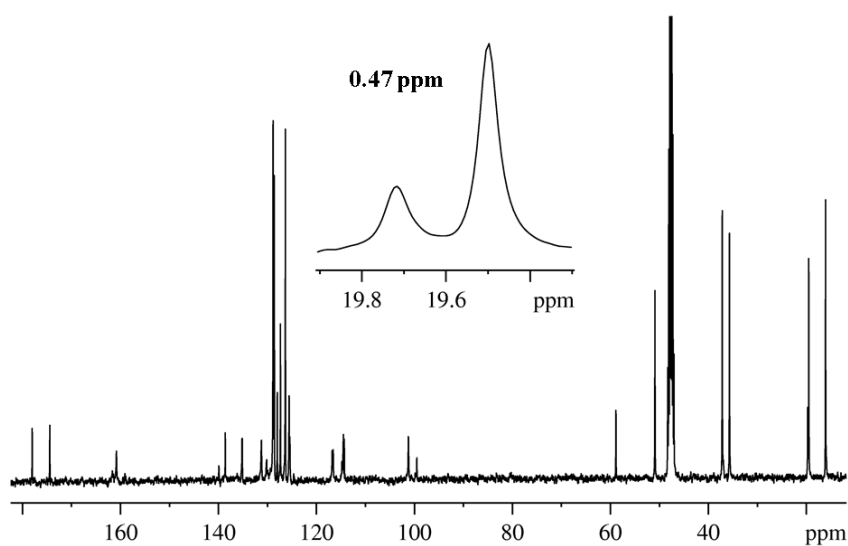

**S21**



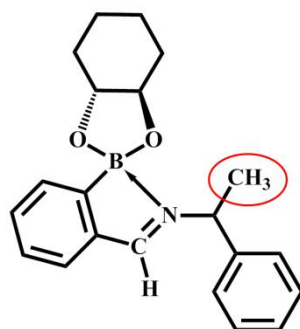

$^{13}\text{C}$ -NMR spectrum of imino boronate esters of alpha-methylbenzylamine

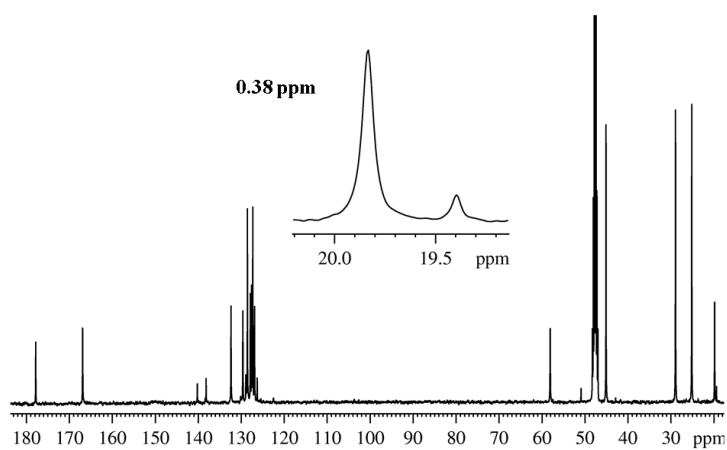

$^{13}\text{C}$ -NMR spectrum of imino boronate esters of alpha-methylbenzylamine

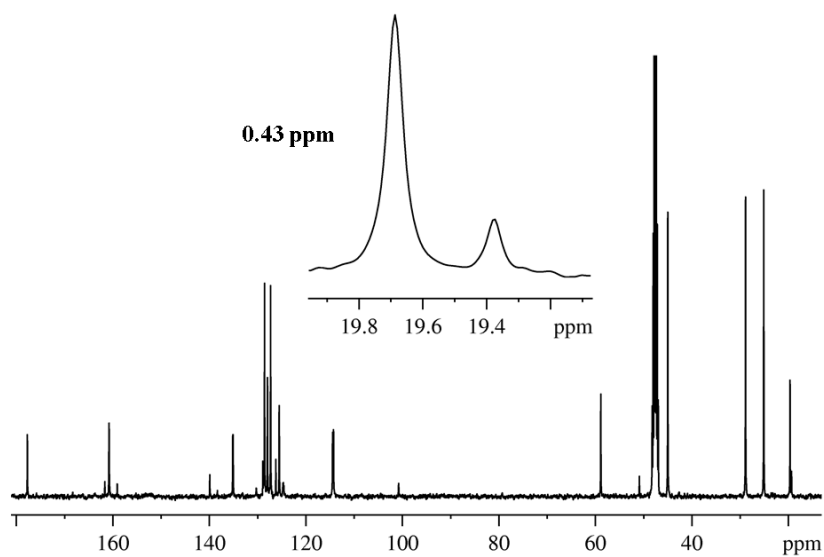

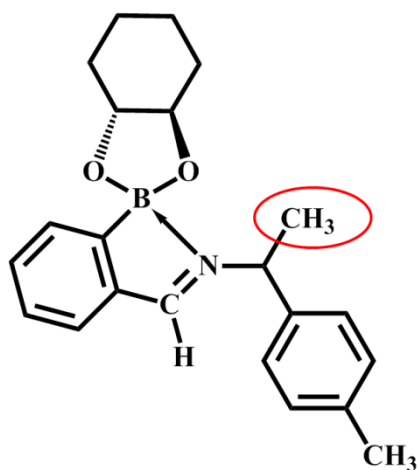

$^{13}\text{C}$ -NMR spectrum of imino boronate esters of 4-methyl- $\alpha$ -phenylethylamine

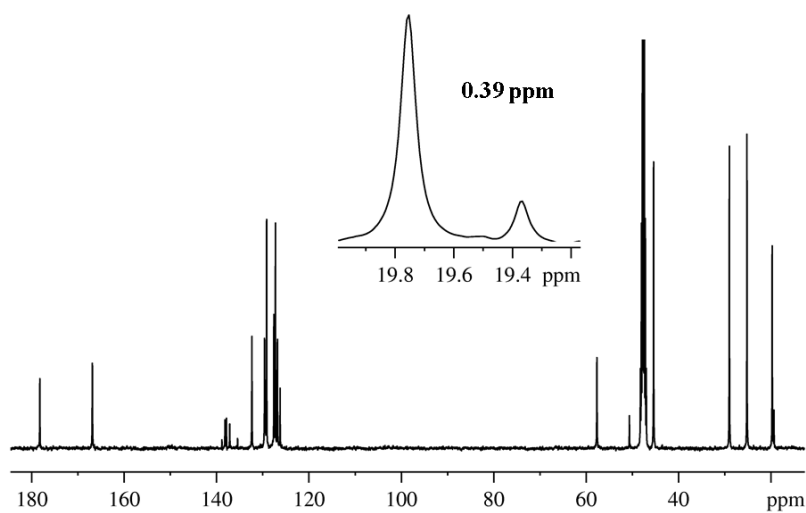

$^{13}\text{C}$ -NMR spectrum of imino boronate esters of 4-methyl- $\alpha$ -phenylethylamine

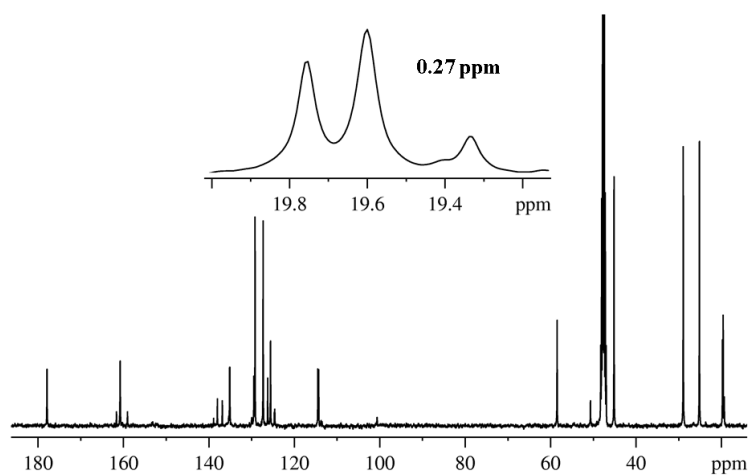

**S23**

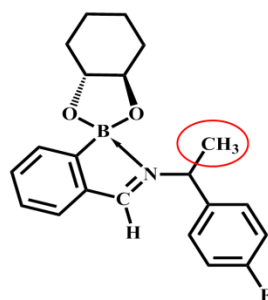

$^{13}\text{C}$ -NMR spectrum of imino boronate esters of 4-Fluoro- $\alpha$ -phenylethylamine

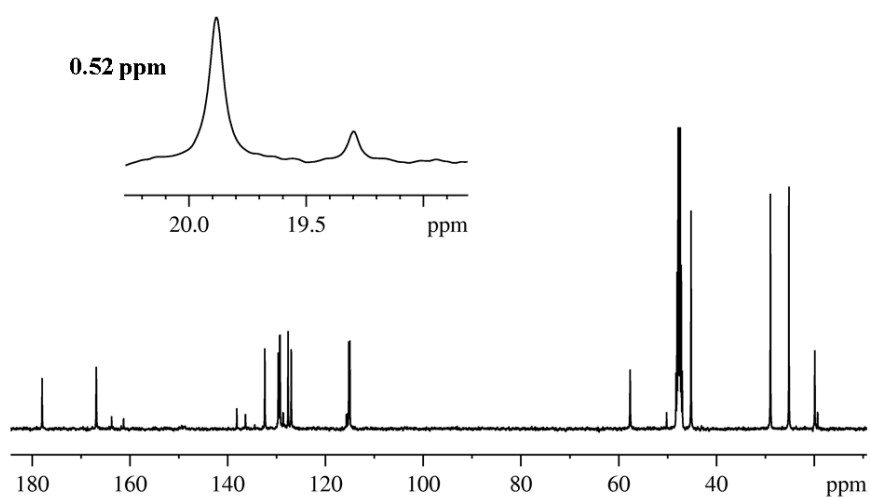

$^{13}\text{C}$ -NMR spectrum of imino boronate esters of 4-Fluoro- $\alpha$ -phenylethylamine

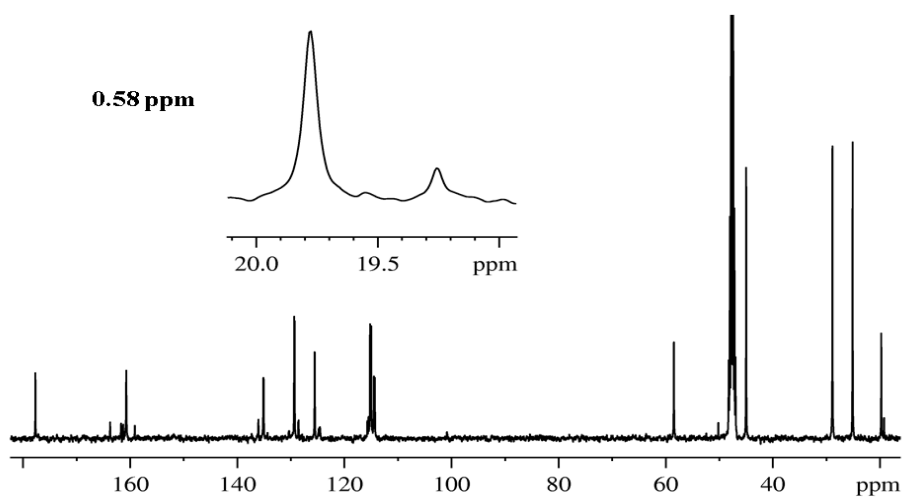

S24

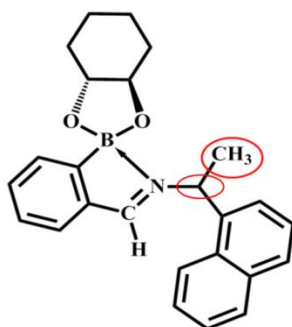

$^{13}\text{C}$ -NMR spectrum of imino boronate esters of 1-(1-Naphthyl)ethylamine

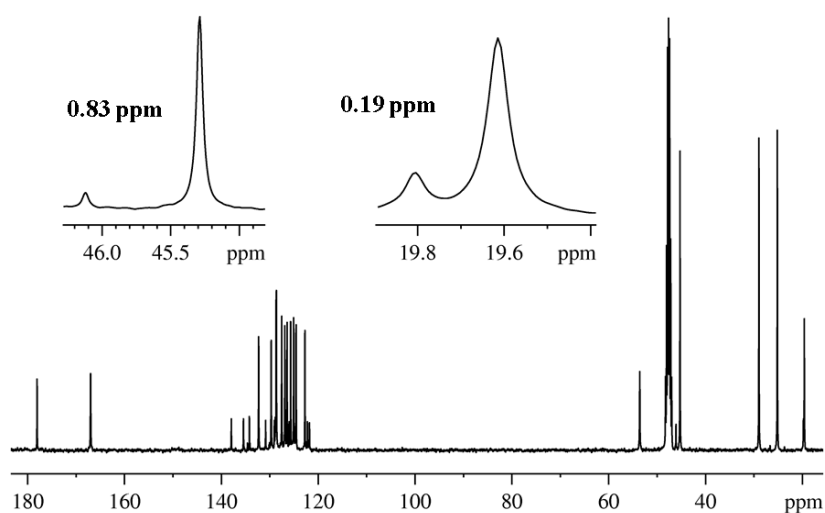

$^{13}\text{C}$ -NMR spectrum of imino boronate esters of 1-(1-Naphthyl)ethylamine

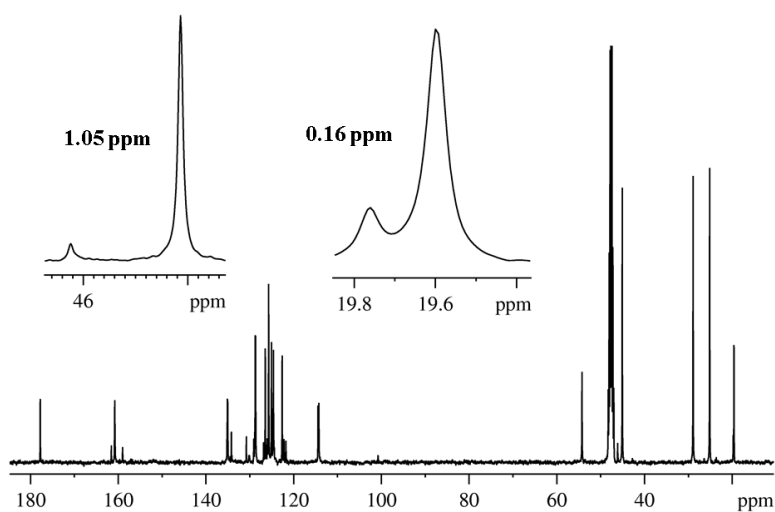

**S25**
